# Supplementary material for: An Effector Peptide Family Required for Drosophila Toll-Mediated Immunity
Source: PubMed Central journal article supplement (PMC4411088; doi:10.1371/journal.ppat.1004876), 2015-04-27
Supplement: ppat.1004876.s001.pdf [file ppat.1004876.s001.pdf]

| Gene Name              | Actual (*) or Predicted Mature Peptide Sequence                                                                                                  |
|------------------------|--------------------------------------------------------------------------------------------------------------------------------------------------|
| <b>Short-Form Boms</b> |                                                                                                                                                  |
| IM1 *†                 | GNVI INGDCRVCNVHG                                                                                                                                |
| CG18107                | GNVI INGDCVNCNVRG                                                                                                                                |
| IM2 *†                 | GNVV INGDCCKYCNVHG                                                                                                                               |
| IM3 *                  | GNVI INGDCRVCNVRA                                                                                                                                |
| CG15065                | GNVI INGDCRHCNVRG                                                                                                                                |
| CG15068                | GNVI INGDCCKVCNIRGD                                                                                                                              |
| <b>Tailed Boms</b>     |                                                                                                                                                  |
| CG43202                | GDIIVHGNCNDCTARA TKNSAHL SIKFTRRW                                                                                                                |
| CG16836                | GQVYINGKCIDCNKPDNDPGI IIPPDHKSAGSMSYTLTSGAIFFGIIYH<br>IFS                                                                                        |
| CG5778                 | AAVYIGGGCYDCNPPG GQGPVYTGNGGRGGGGY NAGGGGGY YNGG<br>GGGGGRRPVYSGNFPGYGNNGGGGGGGYGGGGGGYDDGGLTQIISG                                               |
| <b>Bicipital Boms</b>  |                                                                                                                                                  |
| IM23 *                 | GNVI IGGVCQDCSPPVAENVVGGQSYRTGRPGQGTVYINSPGAYLGAL<br>DGPIRRTGAGGGGGGAQYPDGYSGRLPG GTYLHNKDCVGC S I SGGD                                          |
| CG15067                | GKVTINGKCVNCSHDQ TTTTTHKPTSGKSGGRTTARPSSRSSPARGRP<br>SWDDDDDDDLTGDWALHQ SAGGTQYIGRRSKRQSRGGQYIDLGGSGGRG<br>GGGWAGSGIT TIDSSGYPG GTLVRNSDCVGCNIRG |
| CG5791                 | STVVVNGVCLTCPNPN GEPVYLDGQQYRSFSSSPGDGNVVISRGNDGSG<br>GGGGTIYRRG GNTIVNGRCQHCVDPY                                                                |
